# Supplementary material
Source: publisher figshare collection journal article supplement (https://gsajournals.figshare.com/ndownloader/files/20411313)
Supplement: Supplementary file 1 [file 20411313]

## Sheet: Sheet1
Data type	Experimental species	Symbol/name used in publication	Source – public	Source – published	Source – unpublished	Identifiers	New reagent	Comments
Data type (mandatory) Duplicate rows as needed. Order is flexible, but row titles must be preserved.	Experimental species (mandatory, "NA" okay)	Symbol/name used in publication (mandatory)	Source – public [stock center; company, data repository] (one of D,E,F mandatory)	Source -- published [PMID or 'this paper'] (one of D,E,F mandatory)	Source – unpublished [description, incl. lab of origin] (one of D,E,F mandatory)	Identifiers [format as ID_source:identifier] Separate multiple entries with semi-colon, space	New reagent (mandatory for new entities) Description, progenitor(s)	Comments (optional) Genotypes, purpose of reagent, additional information
Strain, strain_background	Drosophila Melanogaster	W[1118]	Bloomington Drosophila Stock Center			RRID:BDSC_3605
Strain, strain_background	Drosophila Melanogaster	Spen-RNAi y[1] sc[*] v[1] sev[21]; P{y[+t7.7] v[+t1.8]=TRiP.HMS00276}attP2	Bloomington Drosophila Stock Center			RRID:BDSC_33398
Strain, strain_background	Drosophila Melanogaster	W-RNAi y[1] v[1]; P{y[+t7.7] v[+t1.8]=TRiP.JF01545}attP2	Bloomington Drosophila Stock Center			RRID:BDSC_28980
Strain, strain_background	Drosophila Melanogaster	W[1118]; P{w[+mC]=Cg-GAL4.A}2	Bloomington Drosophila Stock Center			RRID:BDSC_7011
other		Corn Syrup	Karo
other		CBW® Golden Light	Briess Malt & Ingregients Co.
other		Active Dry Yeast	Fleischmann's Yeast
other		Nutri-Fly® Drosophila Agar, Gelidium	Flystuff
other		Tegosept	Apex Bioresearch Products
other		Yellow cornmeal	Quaker
other		Propionic Acid Baker 4L	VWR International, LLC
other		Sucrose Crystal Cert ACS 12 kg	Thermo Fisher Life Technology Coroporation
other		Welchers Grape Juice	King Soopers
software, algorithm		Vanquish UHPLC system coupled to a Q Exactive mass spectrometer	University of Colorado Anschutz Medical Campus Metabolomics Core
chemical compound, drug		Methanol	Fisher Scientific
chemical compound, drug		Acetonitrile	Fisher Scientific
software, algorithm		Prism8	GraphPad Software, Inc, La Jolla, CA
